# Supplementary material for: Antimicrobial resistance is a risk factor for mortality in adults with sickle cell disease
Source: PubMed Central journal article supplement — Haematologica. 2020 Oct 29;106(6):1745–8. doi: 10.3324/haematol.2020.267872 (PMC8168496; doi:10.3324/haematol.2020.267872), 2020-10-29
Supplement: 2020_267872_Srisuwananukorn_SUPPL.pdf [file 2020_267872_Srisuwananukorn_SUPPL.pdf]

**Antimicrobial resistance is a risk factor for mortality in adults with sickle cell disease**

---

*Andrew Srisuwananukorn,<sup>1</sup> Jin Han,<sup>1,2</sup> Rasha Raslan,<sup>3</sup> Michel Gowhari,<sup>1</sup> Faiz Hussain,<sup>1</sup> Franklin Njoku,<sup>1</sup> Robert E. Molokie,<sup>1,4</sup> Victor R. Gordeuk<sup>1</sup> and Santosh L. Saraf<sup>1</sup>*

*<sup>1</sup>Sickle Cell Center, Department of Medicine, University of Illinois at Chicago, Chicago, IL, USA; <sup>2</sup>Department of Pharmacy Practice, College of Pharmacy, University of Illinois at Chicago, Chicago, IL, USA; <sup>3</sup>Department of Internal Medicine, Virginia Commonwealth University Medical Center, Richmond, VA, British Columbia, Canada and <sup>4</sup>Department of Medicine, Jesse Brown VA Medical Center, Chicago, IL, USA*

*Correspondence: SANTOSH L. SARAF - [ssaraf@uic.edu](mailto:ssaraf@uic.edu)*

*doi:10.3324/haematol.2020.267872*

**Supplementary Table 1:** ICD-9 and ICD-10 codes for relevant past medical history and procedures in sickle cell disease patients.

| <b>Clinical Diagnosis</b>                                              | <b>ICD-9-CM</b>                                        | <b>ICD-10-CM</b>                                                                    |
|------------------------------------------------------------------------|--------------------------------------------------------|-------------------------------------------------------------------------------------|
| Diabetes Mellitus                                                      | <a href="#">250</a> Diabetes mellitus                  | <a href="#">E10</a> Type 1 diabetes mellitus                                        |
|                                                                        |                                                        | <a href="#">E11</a> Type 2 diabetes mellitus                                        |
| Secondary diabetes mellitus                                            | <a href="#">249</a> Secondary diabetes mellitus        | <a href="#">E08</a> Diabetes mellitus due to underlying condition                   |
|                                                                        |                                                        | <a href="#">E09</a> Drug or chemical induced diabetes mellitus                      |
|                                                                        |                                                        | <a href="#">E13</a> Other specified diabetes mellitus                               |
| <b>Procedure</b>                                                       | <b>ICD-9-PCS</b>                                       | <b>ICD-10-PCS</b>                                                                   |
| Central Venous Catheter Placement (Peripherally or Centrally inserted) | 38.93 Venous catheterization, not elsewhere classified | 02HV33Z Insertion of infusion device into superior vena cava, percutaneous approach |
|                                                                        |                                                        | 06HM33Z Insertion of Infusion Device into Right Femoral Vein, Percutaneous Approach |
| Tunneled Dialysis Catheter Placement                                   | 38.95 for venous catheterization for renal dialysis    | 02HV33Z (infusion device)                                                           |
|                                                                        |                                                        | 0JH63XZ (vascular access device, tunneled)                                          |

**Supplementary Table 2:** Baseline characteristics of patients with sickle cell disease versus African Americans.

|                               | <b>Sickle Cell Disease Cohort<br/>(n = 320)</b> | <b>African American Cohort<br/>(n = 16,000)</b> |
|-------------------------------|-------------------------------------------------|-------------------------------------------------|
| <b>Age (years)</b>            | 37 (29 – 48)                                    | 38 (28 – 48)                                    |
| <b>Sex (male : female)</b>    | 40% : 60%                                       | 40% : 60%                                       |
| <b>Follow up time (years)</b> | 3.1 (2.6 – 3.2)                                 | 3.0 (2.5 – 3.2)                                 |

**Supplementary Table 3:** Sources of infection in patients with sickle cell disease.

| <b>Source</b>            | <b>Number (% of total infections)</b> |
|--------------------------|---------------------------------------|
| Urine                    | 110 (62.5%)                           |
| Blood                    | 39 (22.2%)                            |
| Soft tissue              | 11 (6.3%)                             |
| Nasopharyngeal/Pulmonary | 6 (3.4%)                              |
| Other body fluid         | 4 (2.3%)                              |
| Bone/joint               | 2 (1.1%)                              |
| Cerebrospinal fluid      | 2 (1.1%)                              |
| Vaginal                  | 2 (1.1%)                              |
| <b>Total</b>             | <b>176 (100%)</b>                     |

**Supplementary Table 4:** Organism and antimicrobial resistance patterns in patients with sickle cell disease and African Americans without sickle cell disease.

| Organism                                         | Antimicrobial                 | Sickle Cell Disease |                |       |                           | African American |                |       |                           | Relative Risk | Fisher P value |
|--------------------------------------------------|-------------------------------|---------------------|----------------|-------|---------------------------|------------------|----------------|-------|---------------------------|---------------|----------------|
|                                                  |                               | Susceptible         | Nonsusceptible | Total | Proportion Nonsusceptible | Susceptible      | Nonsusceptible | Total | Proportion Nonsusceptible |               |                |
| <i>Klebsiella pneumoniae</i>                     | Gentamicin                    | 16                  | 9              | 25    | 0.36                      | 440              | 19             | 459   | 0.04                      | 8.70          | 2.09E-06       |
| <i>Klebsiella pneumoniae</i>                     | Tobramycin                    | 16                  | 9              | 25    | 0.36                      | 418              | 41             | 459   | 0.09                      | 4.03          | 3.73E-04       |
| <i>Klebsiella pneumoniae</i>                     | Cefepime                      | 15                  | 10             | 25    | 0.40                      | 398              | 61             | 459   | 0.13                      | 3.01          | 1.31E-03       |
| <i>Klebsiella pneumoniae</i>                     | Ceftazidime                   | 15                  | 10             | 25    | 0.40                      | 398              | 61             | 459   | 0.13                      | 3.01          | 1.31E-03       |
| <i>Klebsiella pneumoniae</i>                     | Ceftriaxone                   | 15                  | 10             | 25    | 0.40                      | 398              | 61             | 459   | 0.13                      | 3.01          | 1.31E-03       |
| <i>Escherichia coli</i>                          | Tobramycin                    | 88                  | 0              | 88    | 0.00                      | 1829             | 163            | 1992  | 0.08                      | 0.00          | 1.60E-03       |
| <i>Klebsiella pneumoniae</i>                     | Piperacillin-Tazobactam       | 15                  | 10             | 25    | 0.40                      | 389              | 70             | 459   | 0.15                      | 2.62          | 3.47E-03       |
| <i>Staphylococcus aureus</i>                     | Erythromycin                  | 17                  | 9              | 26    | 0.35                      | 185              | 301            | 486   | 0.62                      | 0.56          | 7.05E-03       |
| <i>Escherichia coli</i>                          | Gentamicin                    | 87                  | 1              | 88    | 0.01                      | 1826             | 164            | 1990  | 0.08                      | 0.14          | 8.33E-03       |
| <i>Staphylococcus species coagulase negative</i> | Gentamicin                    | 2                   | 3              | 5     | 0.60                      | 34               | 2              | 36    | 0.06                      | 10.80         | 8.65E-03       |
| <i>Klebsiella pneumoniae</i>                     | Ampicillin-Sulbactam          | 12                  | 13             | 25    | 0.52                      | 340              | 118            | 458   | 0.26                      | 2.02          | 9.04E-03       |
| <i>Pseudomonas aeruginosa</i>                    | Meropenem                     | 3                   | 5              | 8     | 0.63                      | 234              | 59             | 293   | 0.20                      | 3.10          | 1.25E-02       |
| <i>Klebsiella pneumoniae</i>                     | Levofloxacin                  | 17                  | 8              | 25    | 0.32                      | 397              | 62             | 459   | 0.14                      | 2.37          | 1.79E-02       |
| <i>Klebsiella pneumoniae</i>                     | Sulfamethoxazole-Trimethoprim | 15                  | 10             | 25    | 0.40                      | 371              | 88             | 459   | 0.19                      | 2.09          | 1.92E-02       |

|                                                  |                               |    |    |    |      |      |      |      |      |      |          |
|--------------------------------------------------|-------------------------------|----|----|----|------|------|------|------|------|------|----------|
| <i>Staphylococcus species coagulase negative</i> | Sulfamethoxazole-Trimethoprim | 1  | 4  | 5  | 0.80 | 28   | 8    | 36   | 0.22 | 3.60 | 2.02E-02 |
| <i>Pseudomonas aeruginosa</i>                    | Cefepime                      | 4  | 4  | 8  | 0.50 | 249  | 44   | 293  | 0.15 | 3.33 | 2.46E-02 |
| <i>Pseudomonas aeruginosa</i>                    | Aztreonam                     | 3  | 5  | 8  | 0.63 | 219  | 74   | 293  | 0.25 | 2.47 | 3.16E-02 |
| <i>Pseudomonas aeruginosa</i>                    | Imipenem                      | 3  | 5  | 8  | 0.63 | 217  | 76   | 293  | 0.26 | 2.41 | 3.51E-02 |
| <i>Escherichia coli</i>                          | Cefazolin                     | 44 | 8  | 52 | 0.15 | 904  | 363  | 1267 | 0.29 | 0.54 | 4.02E-02 |
| <i>Pseudomonas aeruginosa</i>                    | Ticarcillin-Clavulanate       | 0  | 5  | 5  | 1.00 | 17   | 16   | 33   | 0.48 | 2.06 | 5.29E-02 |
| <i>Escherichia coli</i>                          | Cefepime                      | 87 | 1  | 88 | 0.01 | 1868 | 122  | 1990 | 0.06 | 0.19 | 6.01E-02 |
| <i>Escherichia coli</i>                          | Ampicillin                    | 49 | 38 | 87 | 0.44 | 904  | 1061 | 1965 | 0.54 | 0.81 | 6.24E-02 |
| <i>Escherichia coli</i>                          | Ampicillin-Sulbactam          | 54 | 34 | 88 | 0.39 | 1016 | 968  | 1984 | 0.49 | 0.79 | 6.46E-02 |
| <i>Pantoea species</i>                           | Ampicillin                    | 2  | 0  | 2  | 0.00 | 0    | 4    | 4    | 1.00 | 0.00 | 6.67E-02 |
| <i>Klebsiella pneumoniae</i>                     | Cefazolin                     | 9  | 10 | 19 | 0.53 | 174  | 75   | 249  | 0.30 | 1.75 | 6.99E-02 |
| <i>Staphylococcus epidermidis</i>                | Oxacillin                     | 1  | 8  | 9  | 0.89 | 28   | 35   | 63   | 0.56 | 1.60 | 7.49E-02 |
| <i>Escherichia coli</i>                          | Nitrofurantoin                | 80 | 2  | 82 | 0.02 | 1659 | 141  | 1800 | 0.08 | 0.31 | 8.52E-02 |
| <i>Staphylococcus aureus</i>                     | Tetracycline                  | 26 | 0  | 26 | 0.00 | 435  | 51   | 486  | 0.10 | 0.00 | 9.58E-02 |
| <i>Pseudomonas aeruginosa</i>                    | Ceftazidime                   | 5  | 3  | 8  | 0.38 | 250  | 43   | 293  | 0.15 | 2.56 | 1.07E-01 |
| <i>Klebsiella oxytoca</i>                        | Imipenem                      | 3  | 1  | 4  | 0.25 | 33   | 0    | 33   | 0.00 | Inf  | 1.08E-01 |
| <i>Escherichia coli</i>                          | Ceftriaxone                   | 86 | 2  | 88 | 0.02 | 1856 | 133  | 1989 | 0.07 | 0.34 | 1.21E-01 |
| <i>Escherichia coli</i>                          | Ceftazidime                   | 86 | 2  | 88 | 0.02 | 1856 | 134  | 1990 | 0.07 | 0.34 | 1.21E-01 |
| <i>Pseudomonas aeruginosa</i>                    | Ciprofloxacin                 | 3  | 5  | 8  | 0.63 | 197  | 96   | 293  | 0.33 | 1.91 | 1.24E-01 |
| <i>Pseudomonas aeruginosa</i>                    | Levofloxacin                  | 3  | 5  | 8  | 0.63 | 194  | 99   | 293  | 0.34 | 1.85 | 1.30E-01 |

|                                                  |                               |    |    |    |      |      |     |      |      |      |          |
|--------------------------------------------------|-------------------------------|----|----|----|------|------|-----|------|------|------|----------|
| <i>Escherichia coli</i>                          | Piperacillin-Tazobactam       | 84 | 4  | 88 | 0.05 | 1794 | 190 | 1984 | 0.10 | 0.47 | 1.34E-01 |
| <i>Klebsiella oxytoca</i>                        | Ampicillin-Sulbactam          | 1  | 3  | 4  | 0.75 | 22   | 11  | 33   | 0.33 | 2.25 | 1.42E-01 |
| <i>Enterococcus faecium</i>                      | Streptomycin                  | 1  | 1  | 2  | 0.50 | 51   | 5   | 56   | 0.09 | 5.60 | 1.98E-01 |
| <i>Enterococcus faecalis</i>                     | Gentamicin                    | 1  | 2  | 3  | 0.67 | 33   | 12  | 45   | 0.27 | 2.50 | 2.00E-01 |
| <i>Escherichia coli</i>                          | Levofloxacin                  | 65 | 23 | 88 | 0.26 | 1583 | 408 | 1991 | 0.20 | 1.28 | 2.26E-01 |
| <i>Morganella morganii</i>                       | Tobramycin                    | 0  | 1  | 1  | 1.00 | 17   | 5   | 22   | 0.23 | 4.40 | 2.61E-01 |
| <i>Staphylococcus aureus</i>                     | Clindamycin                   | 20 | 2  | 22 | 0.09 | 352  | 94  | 446  | 0.21 | 0.43 | 2.77E-01 |
| <i>Streptococcus pneumoniae</i>                  | Sulfamethoxazole-Trimethoprim | 0  | 1  | 1  | 1.00 | 10   | 3   | 13   | 0.23 | 4.33 | 2.86E-01 |
| <i>Staphylococcus species coagulase negative</i> | Erythromycin                  | 0  | 5  | 5  | 1.00 | 12   | 24  | 36   | 0.67 | 1.50 | 2.98E-01 |
| <i>Morganella morganii</i>                       | Gentamicin                    | 0  | 1  | 1  | 1.00 | 16   | 6   | 22   | 0.27 | 3.67 | 3.04E-01 |
| <i>Enterococcus faecium</i>                      | Tetracycline                  | 1  | 1  | 2  | 0.50 | 8    | 44  | 52   | 0.85 | 0.59 | 3.08E-01 |
| <i>Escherichia coli</i>                          | Sulfamethoxazole-Trimethoprim | 68 | 20 | 88 | 0.23 | 1429 | 561 | 1990 | 0.28 | 0.81 | 3.31E-01 |
| <i>Raoultella planticola</i>                     | Gentamicin                    | 0  | 2  | 2  | 1.00 | 2    | 0   | 2    | 0.00 | Inf  | 3.33E-01 |
| <i>Pseudomonas aeruginosa</i>                    | Piperacillin-Tazobactam       | 6  | 2  | 8  | 0.25 | 249  | 43  | 292  | 0.15 | 1.70 | 3.43E-01 |
| <i>Pseudomonas aeruginosa</i>                    | Gentamicin                    | 8  | 0  | 8  | 0.00 | 241  | 52  | 293  | 0.18 | 0.00 | 3.59E-01 |
| <i>Staphylococcus epidermidis</i>                | Gentamicin                    | 6  | 3  | 9  | 0.33 | 43   | 9   | 52   | 0.17 | 1.93 | 3.61E-01 |
| <i>Staphylococcus aureus</i>                     | Levofloxacin                  | 0  | 1  | 1  | 1.00 | 5    | 2   | 7    | 0.29 | 3.50 | 3.75E-01 |
| <i>Staphylococcus aureus</i>                     | Sulfamethoxazole-Trimethoprim | 26 | 0  | 26 | 0.00 | 453  | 33  | 486  | 0.07 | 0.00 | 4.00E-01 |

|                                                  |                               |    |    |    |      |     |     |     |      |      |          |
|--------------------------------------------------|-------------------------------|----|----|----|------|-----|-----|-----|------|------|----------|
| <i>Enterobacter cloacae</i>                      | Nitrofurantoin                | 1  | 0  | 1  | 0.00 | 19  | 30  | 49  | 0.61 | 0.00 | 4.00E-01 |
| <i>Streptococcus pneumoniae</i>                  | Erythromycin                  | 1  | 0  | 1  | 0.00 | 5   | 8   | 13  | 0.62 | 0.00 | 4.29E-01 |
| <i>Acinetobacter baumannii (anitratu)</i>        | Imipenem                      | 1  | 0  | 1  | 0.00 | 24  | 33  | 57  | 0.58 | 0.00 | 4.31E-01 |
| <i>Acinetobacter baumannii (anitratu)</i>        | Levofloxacin                  | 1  | 0  | 1  | 0.00 | 24  | 33  | 57  | 0.58 | 0.00 | 4.31E-01 |
| <i>Morganella morganii</i>                       | Sulfamethoxazole-Trimethoprim | 0  | 1  | 1  | 1.00 | 13  | 9   | 22  | 0.41 | 2.44 | 4.35E-01 |
| <i>Beta hemolytic streptococcus groupb</i>       | Erythromycin                  | 1  | 0  | 1  | 0.00 | 11  | 14  | 25  | 0.56 | 0.00 | 4.62E-01 |
| <i>Enterococcus faecalis</i>                     | Vancomycin                    | 2  | 1  | 3  | 0.33 | 39  | 10  | 49  | 0.20 | 1.63 | 5.18E-01 |
| <i>Staphylococcus aureus</i>                     | Oxacillin                     | 12 | 14 | 26 | 0.54 | 262 | 224 | 486 | 0.46 | 1.17 | 5.46E-01 |
| <i>Staphylococcus species coagulase negative</i> | Tetracycline                  | 4  | 1  | 5  | 0.20 | 31  | 5   | 36  | 0.14 | 1.44 | 5.67E-01 |
| <i>Klebsiella oxytoca</i>                        | Sulfamethoxazole-Trimethoprim | 4  | 0  | 4  | 0.00 | 26  | 7   | 33  | 0.21 | 0.00 | 5.70E-01 |
| <i>Klebsiella pneumoniae</i>                     | Imipenem                      | 25 | 0  | 25 | 0.00 | 439 | 18  | 457 | 0.04 | 0.00 | 6.15E-01 |
| <i>Staphylococcus epidermidis</i>                | Clindamycin                   | 1  | 4  | 5  | 0.80 | 22  | 29  | 51  | 0.57 | 1.41 | 6.39E-01 |
| <i>Staphylococcus epidermidis</i>                | Erythromycin                  | 1  | 8  | 9  | 0.89 | 12  | 40  | 52  | 0.77 | 1.16 | 6.69E-01 |
| <i>Staphylococcus epidermidis</i>                | Sulfamethoxazole-Trimethoprim | 5  | 4  | 9  | 0.44 | 23  | 29  | 52  | 0.56 | 0.80 | 7.20E-01 |
| <i>Klebsiella pneumoniae</i>                     | Nitrofurantoin                | 7  | 16 | 23 | 0.70 | 104 | 267 | 371 | 0.72 | 0.97 | 8.13E-01 |



|                                   |                               |    |   |    |      |      |    |      |      |      |          |
|-----------------------------------|-------------------------------|----|---|----|------|------|----|------|------|------|----------|
| <i>Klebsiella pneumoniae</i>      | Amikacin                      | 25 | 0 | 25 | 0.00 | 448  | 11 | 459  | 0.02 | 0.00 | 1.00E+00 |
| <i>Staphylococcus epidermidis</i> | Tetracycline                  | 8  | 1 | 9  | 0.11 | 44   | 8  | 52   | 0.15 | 0.72 | 1.00E+00 |
| <i>Klebsiella oxytoca</i>         | Cefepime                      | 4  | 0 | 4  | 0.00 | 31   | 2  | 33   | 0.06 | 0.00 | 1.00E+00 |
| <i>Klebsiella oxytoca</i>         | Ceftazidime                   | 4  | 0 | 4  | 0.00 | 31   | 2  | 33   | 0.06 | 0.00 | 1.00E+00 |
| <i>Proteus mirabilis</i>          | Ampicillin                    | 3  | 0 | 3  | 0.00 | 192  | 46 | 238  | 0.19 | 0.00 | 1.00E+00 |
| <i>Proteus mirabilis</i>          | Ceftazidime                   | 3  | 0 | 3  | 0.00 | 215  | 23 | 238  | 0.10 | 0.00 | 1.00E+00 |
| <i>Enterococcus faecium</i>       | Vancomycin                    | 0  | 2 | 2  | 1.00 | 5    | 51 | 56   | 0.91 | 1.10 | 1.00E+00 |
| <i>Serratia marcescens</i>        | Cefepime                      | 2  | 0 | 2  | 0.00 | 53   | 2  | 55   | 0.04 | 0.00 | 1.00E+00 |
| <i>Serratia marcescens</i>        | Ceftazidime                   | 2  | 0 | 2  | 0.00 | 53   | 2  | 55   | 0.04 | 0.00 | 1.00E+00 |
| <i>Serratia marcescens</i>        | Ceftriaxone                   | 2  | 0 | 2  | 0.00 | 53   | 2  | 55   | 0.04 | 0.00 | 1.00E+00 |
| <i>Citrobacter freundii</i>       | Cefepime                      | 1  | 0 | 1  | 0.00 | 15   | 2  | 17   | 0.12 | 0.00 | 1.00E+00 |
| <i>Citrobacter freundii</i>       | Tobramycin                    | 1  | 0 | 1  | 0.00 | 15   | 2  | 17   | 0.12 | 0.00 | 1.00E+00 |
| <i>Enterobacter cloacae</i>       | Sulfamethoxazole-Trimethoprim | 1  | 0 | 1  | 0.00 | 75   | 17 | 92   | 0.18 | 0.00 | 1.00E+00 |
| <i>Enterococcus faecalis</i>      | Tetracycline                  | 0  | 1 | 1  | 1.00 | 4    | 12 | 16   | 0.75 | 1.33 | 1.00E+00 |
| <i>Morganella morganii</i>        | Ampicillin-Sulbactam          | 0  | 1 | 1  | 1.00 | 3    | 19 | 22   | 0.86 | 1.16 | 1.00E+00 |
| <i>Escherichia coli</i>           | Amikacin                      | 88 | 0 | 88 | 0.00 | 1982 | 10 | 1992 | 0.01 | 0.00 | 1.00E+00 |
| <i>Escherichia coli</i>           | Imipenem                      | 84 | 0 | 84 | 0.00 | 1967 | 2  | 1969 | 0.00 | 0.00 | 1.00E+00 |
| <i>Staphylococcus aureus</i>      | Gentamicin                    | 26 | 0 | 26 | 0.00 | 481  | 5  | 486  | 0.01 | 0.00 | 1.00E+00 |
| <i>Staphylococcus aureus</i>      | Rifampin                      | 26 | 0 | 26 | 0.00 | 483  | 3  | 486  | 0.01 | 0.00 | 1.00E+00 |

|                                                  |                         |    |   |    |      |     |    |     |      |      |          |
|--------------------------------------------------|-------------------------|----|---|----|------|-----|----|-----|------|------|----------|
| <i>Staphylococcus aureus</i>                     | Vancomycin              | 26 | 0 | 26 | 0.00 | 485 | 0  | 485 | 0.00 | NaN  | 1.00E+00 |
| <i>Staphylococcus epidermidis</i>                | Vancomycin              | 9  | 0 | 9  | 0.00 | 52  | 0  | 52  | 0.00 | NaN  | 1.00E+00 |
| <i>Pseudomonas aeruginosa</i>                    | Amikacin                | 8  | 0 | 8  | 0.00 | 279 | 14 | 293 | 0.05 | 0.00 | 1.00E+00 |
| <i>Pseudomonas aeruginosa</i>                    | Tobramycin              | 8  | 0 | 8  | 0.00 | 271 | 22 | 293 | 0.08 | 0.00 | 1.00E+00 |
| <i>Staphylococcus species coagulase negative</i> | Clindamycin             | 2  | 3 | 5  | 0.60 | 17  | 16 | 33  | 0.48 | 1.24 | 1.00E+00 |
| <i>Staphylococcus species coagulase negative</i> | Oxacillin               | 2  | 3 | 5  | 0.60 | 32  | 41 | 73  | 0.56 | 1.07 | 1.00E+00 |
| <i>Staphylococcus species coagulase negative</i> | Vancomycin              | 5  | 0 | 5  | 0.00 | 36  | 0  | 36  | 0.00 | NaN  | 1.00E+00 |
| <i>Klebsiella oxytoca</i>                        | Amikacin                | 4  | 0 | 4  | 0.00 | 33  | 0  | 33  | 0.00 | NaN  | 1.00E+00 |
| <i>Klebsiella oxytoca</i>                        | Cefazolin               | 0  | 4 | 4  | 1.00 | 0   | 14 | 14  | 1.00 | 1.00 | 1.00E+00 |
| <i>Klebsiella oxytoca</i>                        | Ceftriaxone             | 4  | 0 | 4  | 0.00 | 30  | 3  | 33  | 0.09 | 0.00 | 1.00E+00 |
| <i>Klebsiella oxytoca</i>                        | Gentamicin              | 4  | 0 | 4  | 0.00 | 32  | 1  | 33  | 0.03 | 0.00 | 1.00E+00 |
| <i>Klebsiella oxytoca</i>                        | Levofloxacin            | 4  | 0 | 4  | 0.00 | 32  | 1  | 33  | 0.03 | 0.00 | 1.00E+00 |
| <i>Klebsiella oxytoca</i>                        | Nitrofurantoin          | 4  | 0 | 4  | 0.00 | 18  | 4  | 22  | 0.18 | 0.00 | 1.00E+00 |
| <i>Klebsiella oxytoca</i>                        | Piperacillin-Tazobactam | 4  | 0 | 4  | 0.00 | 29  | 4  | 33  | 0.12 | 0.00 | 1.00E+00 |
| <i>Klebsiella oxytoca</i>                        | Tobramycin              | 4  | 0 | 4  | 0.00 | 30  | 3  | 33  | 0.09 | 0.00 | 1.00E+00 |
| <i>Candida albicans</i>                          | Anidulafungin           | 3  | 0 | 3  | 0.00 | 28  | 0  | 28  | 0.00 | NaN  | 1.00E+00 |
| <i>Candida albicans</i>                          | Caspofungin             | 3  | 0 | 3  | 0.00 | 28  | 0  | 28  | 0.00 | NaN  | 1.00E+00 |
| <i>Candida albicans</i>                          | Fluconazole             | 3  | 0 | 3  | 0.00 | 22  | 6  | 28  | 0.21 | 0.00 | 1.00E+00 |
| <i>Candida albicans</i>                          | Micafungin              | 3  | 0 | 3  | 0.00 | 28  | 0  | 28  | 0.00 | NaN  | 1.00E+00 |
| <i>Candida albicans</i>                          | Voriconazole            | 3  | 0 | 3  | 0.00 | 24  | 4  | 28  | 0.14 | 0.00 | 1.00E+00 |
| <i>Enterococcus</i>                              | Ampicillin              | 3  | 0 | 3  | 0.00 | 44  | 2  | 46  | 0.04 | 0.00 | 1.00E+00 |

|                              |                               |   |   |   |      |     |    |     |      |      |          |
|------------------------------|-------------------------------|---|---|---|------|-----|----|-----|------|------|----------|
| <i>faecalis</i>              |                               |   |   |   |      |     |    |     |      |      |          |
| <i>Enterococcus faecalis</i> | Daptomycin                    | 3 | 0 | 3 | 0.00 | 13  | 0  | 13  | 0.00 | NaN  | 1.00E+00 |
| <i>Enterococcus faecalis</i> | Streptomycin                  | 3 | 0 | 3 | 0.00 | 37  | 8  | 45  | 0.18 | 0.00 | 1.00E+00 |
| <i>Proteus mirabilis</i>     | Amikacin                      | 3 | 0 | 3 | 0.00 | 238 | 0  | 238 | 0.00 | NaN  | 1.00E+00 |
| <i>Proteus mirabilis</i>     | Ampicillin-Sulbactam          | 3 | 0 | 3 | 0.00 | 198 | 40 | 238 | 0.17 | 0.00 | 1.00E+00 |
| <i>Proteus mirabilis</i>     | Cefepime                      | 3 | 0 | 3 | 0.00 | 217 | 21 | 238 | 0.09 | 0.00 | 1.00E+00 |
| <i>Proteus mirabilis</i>     | Ceftriaxone                   | 3 | 0 | 3 | 0.00 | 217 | 21 | 238 | 0.09 | 0.00 | 1.00E+00 |
| <i>Proteus mirabilis</i>     | Gentamicin                    | 3 | 0 | 3 | 0.00 | 223 | 15 | 238 | 0.06 | 0.00 | 1.00E+00 |
| <i>Proteus mirabilis</i>     | Levofloxacin                  | 3 | 0 | 3 | 0.00 | 197 | 41 | 238 | 0.17 | 0.00 | 1.00E+00 |
| <i>Proteus mirabilis</i>     | Piperacillin-Tazobactam       | 3 | 0 | 3 | 0.00 | 211 | 21 | 232 | 0.09 | 0.00 | 1.00E+00 |
| <i>Proteus mirabilis</i>     | Sulfamethoxazole-Trimethoprim | 3 | 0 | 3 | 0.00 | 207 | 31 | 238 | 0.13 | 0.00 | 1.00E+00 |
| <i>Proteus mirabilis</i>     | Tobramycin                    | 3 | 0 | 3 | 0.00 | 223 | 15 | 238 | 0.06 | 0.00 | 1.00E+00 |
| <i>Staphylococcus aureus</i> | Daptomycin                    | 3 | 0 | 3 | 0.00 | 4   | 0  | 4   | 0.00 | NaN  | 1.00E+00 |
| <i>Enterococcus faecium</i>  | Ampicillin                    | 0 | 2 | 2 | 1.00 | 1   | 53 | 54  | 0.98 | 1.02 | 1.00E+00 |
| <i>Enterococcus faecium</i>  | Daptomycin                    | 2 | 0 | 2 | 0.00 | 47  | 4  | 51  | 0.08 | 0.00 | 1.00E+00 |
| <i>Enterococcus faecium</i>  | Erythromycin                  | 0 | 2 | 2 | 1.00 | 0   | 51 | 51  | 1.00 | 1.00 | 1.00E+00 |
| <i>Enterococcus faecium</i>  | Gentamicin                    | 2 | 0 | 2 | 0.00 | 50  | 6  | 56  | 0.11 | 0.00 | 1.00E+00 |
| <i>Enterococcus faecium</i>  | Linezolid                     | 2 | 0 | 2 | 0.00 | 48  | 5  | 53  | 0.09 | 0.00 | 1.00E+00 |
| <i>Enterococcus faecium</i>  | Quinupristin-Dalfopristin     | 2 | 0 | 2 | 0.00 | 47  | 4  | 51  | 0.08 | 0.00 | 1.00E+00 |
| <i>Enterococcus faecium</i>  | Rifampin                      | 0 | 2 | 2 | 1.00 | 0   | 51 | 51  | 1.00 | 1.00 | 1.00E+00 |
| <i>Pantoea species</i>       | Amikacin                      | 2 | 0 | 2 | 0.00 | 4   | 0  | 4   | 0.00 | NaN  | 1.00E+00 |

|                               |                               |   |   |   |      |    |     |     |      |      |          |
|-------------------------------|-------------------------------|---|---|---|------|----|-----|-----|------|------|----------|
| <i>Pantoea species</i>        | Ampicillin-Sulbactam          | 2 | 0 | 2 | 0.00 | 3  | 1   | 4   | 0.25 | 0.00 | 1.00E+00 |
| <i>Pantoea species</i>        | Cefazolin                     | 1 | 1 | 2 | 0.50 | 2  | 2   | 4   | 0.50 | 1.00 | 1.00E+00 |
| <i>Pantoea species</i>        | Cefepime                      | 2 | 0 | 2 | 0.00 | 3  | 1   | 4   | 0.25 | 0.00 | 1.00E+00 |
| <i>Pantoea species</i>        | Ceftazidime                   | 2 | 0 | 2 | 0.00 | 3  | 1   | 4   | 0.25 | 0.00 | 1.00E+00 |
| <i>Pantoea species</i>        | Ceftriaxone                   | 2 | 0 | 2 | 0.00 | 3  | 1   | 4   | 0.25 | 0.00 | 1.00E+00 |
| <i>Pantoea species</i>        | Gentamicin                    | 2 | 0 | 2 | 0.00 | 3  | 1   | 4   | 0.25 | 0.00 | 1.00E+00 |
| <i>Pantoea species</i>        | Imipenem                      | 2 | 0 | 2 | 0.00 | 3  | 0   | 3   | 0.00 | NaN  | 1.00E+00 |
| <i>Pantoea species</i>        | Levofloxacin                  | 2 | 0 | 2 | 0.00 | 3  | 1   | 4   | 0.25 | 0.00 | 1.00E+00 |
| <i>Pantoea species</i>        | Piperacillin-Tazobactam       | 2 | 0 | 2 | 0.00 | 3  | 1   | 4   | 0.25 | 0.00 | 1.00E+00 |
| <i>Pantoea species</i>        | Sulfamethoxazole-Trimethoprim | 2 | 0 | 2 | 0.00 | 4  | 0   | 4   | 0.00 | NaN  | 1.00E+00 |
| <i>Pantoea species</i>        | Tobramycin                    | 2 | 0 | 2 | 0.00 | 3  | 1   | 4   | 0.25 | 0.00 | 1.00E+00 |
| <i>Proteus mirabilis</i>      | Nitrofurantoin                | 0 | 2 | 2 | 1.00 | 0  | 167 | 167 | 1.00 | 1.00 | 1.00E+00 |
| <i>Pseudomonas aeruginosa</i> | Colistin                      | 2 | 0 | 2 | 0.00 | 30 | 1   | 31  | 0.03 | 0.00 | 1.00E+00 |
| <i>Raoultella planticola</i>  | Amikacin                      | 2 | 0 | 2 | 0.00 | 2  | 0   | 2   | 0.00 | NaN  | 1.00E+00 |
| <i>Raoultella planticola</i>  | Ampicillin                    | 0 | 2 | 2 | 1.00 | 0  | 2   | 2   | 1.00 | 1.00 | 1.00E+00 |
| <i>Raoultella planticola</i>  | Ampicillin-Sulbactam          | 0 | 2 | 2 | 1.00 | 1  | 1   | 2   | 0.50 | 2.00 | 1.00E+00 |
| <i>Raoultella planticola</i>  | Cefazolin                     | 0 | 2 | 2 | 1.00 | 1  | 1   | 2   | 0.50 | 2.00 | 1.00E+00 |
| <i>Raoultella planticola</i>  | Cefepime                      | 0 | 2 | 2 | 1.00 | 1  | 1   | 2   | 0.50 | 2.00 | 1.00E+00 |
| <i>Raoultella planticola</i>  | Ceftazidime                   | 0 | 2 | 2 | 1.00 | 1  | 1   | 2   | 0.50 | 2.00 | 1.00E+00 |
| <i>Raoultella planticola</i>  | Ceftriaxone                   | 0 | 2 | 2 | 1.00 | 1  | 1   | 2   | 0.50 | 2.00 | 1.00E+00 |
| <i>Raoultella planticola</i>  | Levofloxacin                  | 2 | 0 | 2 | 0.00 | 2  | 0   | 2   | 0.00 | NaN  | 1.00E+00 |
| <i>Raoultella</i>             | Nitrofurantoin                | 2 | 0 | 2 | 0.00 | 1  | 0   | 1   | 0.00 | NaN  | 1.00E+00 |

|                                           |                               |   |   |   |      |    |    |    |      |      |          |
|-------------------------------------------|-------------------------------|---|---|---|------|----|----|----|------|------|----------|
| <i>planticola</i>                         |                               |   |   |   |      |    |    |    |      |      |          |
| <i>Raoultella planticola</i>              | Piperacillin-Tazobactam       | 0 | 2 | 2 | 1.00 | 1  | 1  | 2  | 0.50 | 2.00 | 1.00E+00 |
| <i>Raoultella planticola</i>              | Sulfamethoxazole-Trimethoprim | 0 | 2 | 2 | 1.00 | 1  | 1  | 2  | 0.50 | 2.00 | 1.00E+00 |
| <i>Raoultella planticola</i>              | Tobramycin                    | 0 | 2 | 2 | 1.00 | 1  | 1  | 2  | 0.50 | 2.00 | 1.00E+00 |
| <i>Serratia marcescens</i>                | Amikacin                      | 2 | 0 | 2 | 0.00 | 55 | 0  | 55 | 0.00 | NaN  | 1.00E+00 |
| <i>Serratia marcescens</i>                | Cefazolin                     | 0 | 2 | 2 | 1.00 | 0  | 52 | 52 | 1.00 | 1.00 | 1.00E+00 |
| <i>Serratia marcescens</i>                | Gentamicin                    | 2 | 0 | 2 | 0.00 | 54 | 1  | 55 | 0.02 | 0.00 | 1.00E+00 |
| <i>Serratia marcescens</i>                | Levofloxacin                  | 2 | 0 | 2 | 0.00 | 55 | 0  | 55 | 0.00 | NaN  | 1.00E+00 |
| <i>Serratia marcescens</i>                | Sulfamethoxazole-Trimethoprim | 2 | 0 | 2 | 0.00 | 55 | 0  | 55 | 0.00 | NaN  | 1.00E+00 |
| <i>Serratia marcescens</i>                | Tobramycin                    | 2 | 0 | 2 | 0.00 | 45 | 10 | 55 | 0.18 | 0.00 | 1.00E+00 |
| <i>Acinetobacter baumannii (anitratu)</i> | Ceftazidime                   | 0 | 1 | 1 | 1.00 | 24 | 33 | 57 | 0.58 | 1.73 | 1.00E+00 |
| <i>Acinetobacter baumannii (anitratu)</i> | Gentamicin                    | 1 | 0 | 1 | 0.00 | 37 | 20 | 57 | 0.35 | 0.00 | 1.00E+00 |
| <i>Acinetobacter baumannii (anitratu)</i> | Piperacillin-Tazobactam       | 0 | 1 | 1 | 1.00 | 18 | 39 | 57 | 0.68 | 1.46 | 1.00E+00 |
| <i>Acinetobacter baumannii (anitratu)</i> | Tobramycin                    | 1 | 0 | 1 | 0.00 | 36 | 21 | 57 | 0.37 | 0.00 | 1.00E+00 |
| <i>Bacillus cereus</i>                    | Clindamycin                   | 1 | 0 | 1 | 0.00 | 0  | 0  | 0  | NaN  | NaN  | 1.00E+00 |
| <i>Bacillus cereus</i>                    | Erythromycin                  | 1 | 0 | 1 | 0.00 | 0  | 0  | 0  | NaN  | NaN  | 1.00E+00 |

|                                            |                               |   |   |   |      |    |    |    |      |      |          |
|--------------------------------------------|-------------------------------|---|---|---|------|----|----|----|------|------|----------|
| <i>Bacillus cereus</i>                     | Penicillin                    | 0 | 1 | 1 | 1.00 | 0  | 0  | 0  | NaN  | NaN  | 1.00E+00 |
| <i>Bacillus cereus</i>                     | Vancomycin                    | 1 | 0 | 1 | 0.00 | 0  | 0  | 0  | NaN  | NaN  | 1.00E+00 |
| <i>Bacillus species not anthracis</i>      | Clindamycin                   | 1 | 0 | 1 | 0.00 | 0  | 0  | 0  | NaN  | NaN  | 1.00E+00 |
| <i>Bacillus species not anthracis</i>      | Levofloxacin                  | 1 | 0 | 1 | 0.00 | 0  | 0  | 0  | NaN  | NaN  | 1.00E+00 |
| <i>Beta hemolytic streptococcus groupb</i> | Ceftriaxone                   | 1 | 0 | 1 | 0.00 | 23 | 0  | 23 | 0.00 | NaN  | 1.00E+00 |
| <i>Beta hemolytic streptococcus groupb</i> | Clindamycin                   | 0 | 1 | 1 | 1.00 | 13 | 12 | 25 | 0.48 | 2.08 | 1.00E+00 |
| <i>Beta hemolytic streptococcus groupb</i> | Levofloxacin                  | 1 | 0 | 1 | 0.00 | 25 | 0  | 25 | 0.00 | NaN  | 1.00E+00 |
| <i>Beta hemolytic streptococcus groupb</i> | Penicillin                    | 1 | 0 | 1 | 0.00 | 24 | 0  | 24 | 0.00 | NaN  | 1.00E+00 |
| <i>Beta hemolytic streptococcus groupb</i> | Vancomycin                    | 1 | 0 | 1 | 0.00 | 25 | 0  | 25 | 0.00 | NaN  | 1.00E+00 |
| <i>Burkholderia cepacia</i>                | Ceftazidime                   | 1 | 0 | 1 | 0.00 | 0  | 0  | 0  | NaN  | NaN  | 1.00E+00 |
| <i>Burkholderia cepacia</i>                | Levofloxacin                  | 0 | 1 | 1 | 1.00 | 0  | 0  | 0  | NaN  | NaN  | 1.00E+00 |
| <i>Burkholderia cepacia</i>                | Meropenem                     | 1 | 0 | 1 | 0.00 | 0  | 0  | 0  | NaN  | NaN  | 1.00E+00 |
| <i>Burkholderia cepacia</i>                | Sulfamethoxazole-Trimethoprim | 1 | 0 | 1 | 0.00 | 0  | 0  | 0  | NaN  | NaN  | 1.00E+00 |
| <i>Candida (torulopsis) glabrata</i>       | Anidulafungin                 | 1 | 0 | 1 | 0.00 | 16 | 1  | 17 | 0.06 | 0.00 | 1.00E+00 |
| <i>Candida</i>                             | Caspofungin                   | 1 | 0 | 1 | 0.00 | 14 | 3  | 17 | 0.18 | 0.00 | 1.00E+00 |

|                                      |               |   |   |   |      |    |    |    |      |      |          |
|--------------------------------------|---------------|---|---|---|------|----|----|----|------|------|----------|
| <i>(torulopsis) glabrata</i>         |               |   |   |   |      |    |    |    |      |      |          |
| <i>Candida (torulopsis) glabrata</i> | Fluconazole   | 1 | 0 | 1 | 0.00 | 10 | 7  | 17 | 0.41 | 0.00 | 1.00E+00 |
| <i>Candida (torulopsis) glabrata</i> | Micafungin    | 1 | 0 | 1 | 0.00 | 16 | 1  | 17 | 0.06 | 0.00 | 1.00E+00 |
| <i>Candida lusitaniae</i>            | Fluconazole   | 1 | 0 | 1 | 0.00 | 1  | 0  | 1  | 0.00 | NaN  | 1.00E+00 |
| <i>Candida parapsilosis</i>          | Anidulafungin | 1 | 0 | 1 | 0.00 | 6  | 0  | 6  | 0.00 | NaN  | 1.00E+00 |
| <i>Candida parapsilosis</i>          | Caspofungin   | 1 | 0 | 1 | 0.00 | 6  | 0  | 6  | 0.00 | NaN  | 1.00E+00 |
| <i>Candida parapsilosis</i>          | Fluconazole   | 1 | 0 | 1 | 0.00 | 6  | 0  | 6  | 0.00 | NaN  | 1.00E+00 |
| <i>Candida parapsilosis</i>          | Micafungin    | 1 | 0 | 1 | 0.00 | 6  | 0  | 6  | 0.00 | NaN  | 1.00E+00 |
| <i>Candida parapsilosis</i>          | Voriconazole  | 1 | 0 | 1 | 0.00 | 6  | 0  | 6  | 0.00 | NaN  | 1.00E+00 |
| <i>Citrobacter freundii</i>          | Amikacin      | 1 | 0 | 1 | 0.00 | 17 | 0  | 17 | 0.00 | NaN  | 1.00E+00 |
| <i>Citrobacter freundii</i>          | Cefazolin     | 0 | 1 | 1 | 1.00 | 0  | 15 | 15 | 1.00 | 1.00 | 1.00E+00 |
| <i>Citrobacter freundii</i>          | Ceftazidime   | 1 | 0 | 1 | 0.00 | 14 | 3  | 17 | 0.18 | 0.00 | 1.00E+00 |
| <i>Citrobacter freundii</i>          | Ceftriaxone   | 1 | 0 | 1 | 0.00 | 14 | 3  | 17 | 0.18 | 0.00 | 1.00E+00 |
| <i>Citrobacter freundii</i>          | Gentamicin    | 1 | 0 | 1 | 0.00 | 16 | 1  | 17 | 0.06 | 0.00 | 1.00E+00 |
| <i>Citrobacter freundii</i>          | Imipenem      | 1 | 0 | 1 | 0.00 | 17 | 0  | 17 | 0.00 | NaN  | 1.00E+00 |
| <i>Citrobacter freundii</i>          | Levofloxacin  | 1 | 0 | 1 | 0.00 | 14 | 3  | 17 | 0.18 | 0.00 | 1.00E+00 |

|                             |                               |   |   |   |      |    |    |    |      |      |          |
|-----------------------------|-------------------------------|---|---|---|------|----|----|----|------|------|----------|
| <i>Citrobacter freundii</i> | Nitrofurantoin                | 1 | 0 | 1 | 0.00 | 9  | 1  | 10 | 0.10 | 0.00 | 1.00E+00 |
| <i>Citrobacter youngae</i>  | Amikacin                      | 1 | 0 | 1 | 0.00 | 1  | 0  | 1  | 0.00 | NaN  | 1.00E+00 |
| <i>Citrobacter youngae</i>  | Cefepime                      | 1 | 0 | 1 | 0.00 | 1  | 0  | 1  | 0.00 | NaN  | 1.00E+00 |
| <i>Citrobacter youngae</i>  | Ceftazidime                   | 1 | 0 | 1 | 0.00 | 1  | 0  | 1  | 0.00 | NaN  | 1.00E+00 |
| <i>Citrobacter youngae</i>  | Ceftriaxone                   | 1 | 0 | 1 | 0.00 | 1  | 0  | 1  | 0.00 | NaN  | 1.00E+00 |
| <i>Citrobacter youngae</i>  | Gentamicin                    | 1 | 0 | 1 | 0.00 | 1  | 0  | 1  | 0.00 | NaN  | 1.00E+00 |
| <i>Citrobacter youngae</i>  | Imipenem                      | 1 | 0 | 1 | 0.00 | 1  | 0  | 1  | 0.00 | NaN  | 1.00E+00 |
| <i>Citrobacter youngae</i>  | Levofloxacin                  | 1 | 0 | 1 | 0.00 | 1  | 0  | 1  | 0.00 | NaN  | 1.00E+00 |
| <i>Citrobacter youngae</i>  | Nitrofurantoin                | 1 | 0 | 1 | 0.00 | 0  | 1  | 1  | 1.00 | 0.00 | 1.00E+00 |
| <i>Citrobacter youngae</i>  | Piperacillin-Tazobactam       | 1 | 0 | 1 | 0.00 | 1  | 0  | 1  | 0.00 | NaN  | 1.00E+00 |
| <i>Citrobacter youngae</i>  | Sulfamethoxazole-Trimethoprim | 1 | 0 | 1 | 0.00 | 1  | 0  | 1  | 0.00 | NaN  | 1.00E+00 |
| <i>Citrobacter youngae</i>  | Tobramycin                    | 1 | 0 | 1 | 0.00 | 1  | 0  | 1  | 0.00 | NaN  | 1.00E+00 |
| <i>Enterobacter cloacae</i> | Amikacin                      | 1 | 0 | 1 | 0.00 | 92 | 0  | 92 | 0.00 | NaN  | 1.00E+00 |
| <i>Enterobacter cloacae</i> | Cefepime                      | 1 | 0 | 1 | 0.00 | 80 | 12 | 92 | 0.13 | 0.00 | 1.00E+00 |
| <i>Enterobacter cloacae</i> | Ceftazidime                   | 1 | 0 | 1 | 0.00 | 67 | 25 | 92 | 0.27 | 0.00 | 1.00E+00 |
| <i>Enterobacter cloacae</i> | Ceftriaxone                   | 1 | 0 | 1 | 0.00 | 67 | 25 | 92 | 0.27 | 0.00 | 1.00E+00 |
| <i>Enterobacter cloacae</i> | Gentamicin                    | 1 | 0 | 1 | 0.00 | 92 | 0  | 92 | 0.00 | NaN  | 1.00E+00 |



|                              |                         |   |   |   |      |    |    |    |      |      |          |
|------------------------------|-------------------------|---|---|---|------|----|----|----|------|------|----------|
| <i>Enterobacter cloacae</i>  | Imipenem                | 1 | 0 | 1 | 0.00 | 85 | 6  | 91 | 0.07 | 0.00 | 1.00E+00 |
| <i>Enterobacter cloacae</i>  | Piperacillin-Tazobactam | 1 | 0 | 1 | 0.00 | 60 | 22 | 82 | 0.27 | 0.00 | 1.00E+00 |
| <i>Enterobacter cloacae</i>  | Tobramycin              | 1 | 0 | 1 | 0.00 | 91 | 0  | 91 | 0.00 | NaN  | 1.00E+00 |
| <i>Enterococcus faecalis</i> | Erythromycin            | 0 | 1 | 1 | 1.00 | 1  | 9  | 10 | 0.90 | 1.11 | 1.00E+00 |
| <i>Enterococcus faecalis</i> | Linezolid               | 1 | 0 | 1 | 0.00 | 11 | 0  | 11 | 0.00 | NaN  | 1.00E+00 |
| <i>Enterococcus faecalis</i> | Rifampin                | 1 | 0 | 1 | 0.00 | 8  | 2  | 10 | 0.20 | 0.00 | 1.00E+00 |
| <i>Gram negative rods</i>    | Amikacin                | 1 | 0 | 1 | 0.00 | 2  | 0  | 2  | 0.00 | NaN  | 1.00E+00 |
| <i>Gram negative rods</i>    | Ampicillin              | 1 | 0 | 1 | 0.00 | 0  | 0  | 0  | NaN  | NaN  | 1.00E+00 |
| <i>Gram negative rods</i>    | Ampicillin-Sulbactam    | 1 | 0 | 1 | 0.00 | 0  | 1  | 1  | 1.00 | 0.00 | 1.00E+00 |
| <i>Gram negative rods</i>    | Cefazolin               | 1 | 0 | 1 | 0.00 | 0  | 0  | 0  | NaN  | NaN  | 1.00E+00 |
| <i>Gram negative rods</i>    | Cefepime                | 1 | 0 | 1 | 0.00 | 2  | 0  | 2  | 0.00 | NaN  | 1.00E+00 |
| <i>Gram negative rods</i>    | Ceftazidime             | 1 | 0 | 1 | 0.00 | 2  | 0  | 2  | 0.00 | NaN  | 1.00E+00 |
| <i>Gram negative rods</i>    | Ceftriaxone             | 1 | 0 | 1 | 0.00 | 2  | 0  | 2  | 0.00 | NaN  | 1.00E+00 |
| <i>Gram negative rods</i>    | Gentamicin              | 1 | 0 | 1 | 0.00 | 2  | 0  | 2  | 0.00 | NaN  | 1.00E+00 |
| <i>Gram negative rods</i>    | Imipenem                | 1 | 0 | 1 | 0.00 | 2  | 0  | 2  | 0.00 | NaN  | 1.00E+00 |
| <i>Gram negative rods</i>    | Levofloxacin            | 0 | 1 | 1 | 1.00 | 1  | 1  | 2  | 0.50 | 2.00 | 1.00E+00 |
| <i>Gram negative rods</i>    | Nitrofurantoin          | 1 | 0 | 1 | 0.00 | 1  | 0  | 1  | 0.00 | NaN  | 1.00E+00 |

|                                                  |                               |   |   |   |      |    |    |    |      |      |          |
|--------------------------------------------------|-------------------------------|---|---|---|------|----|----|----|------|------|----------|
| <i>Gram negative rods</i>                        | Piperacillin-Tazobactam       | 1 | 0 | 1 | 0.00 | 2  | 0  | 2  | 0.00 | NaN  | 1.00E+00 |
| <i>Gram negative rods</i>                        | Sulfamethoxazole-Trimethoprim | 1 | 0 | 1 | 0.00 | 1  | 1  | 2  | 0.50 | 0.00 | 1.00E+00 |
| <i>Gram negative rods</i>                        | Tobramycin                    | 1 | 0 | 1 | 0.00 | 2  | 0  | 2  | 0.00 | NaN  | 1.00E+00 |
| <i>Morganella morganii</i>                       | Amikacin                      | 1 | 0 | 1 | 0.00 | 22 | 0  | 22 | 0.00 | NaN  | 1.00E+00 |
| <i>Morganella morganii</i>                       | Ampicillin                    | 0 | 1 | 1 | 1.00 | 0  | 22 | 22 | 1.00 | 1.00 | 1.00E+00 |
| <i>Morganella morganii</i>                       | Cefazolin                     | 0 | 1 | 1 | 1.00 | 0  | 20 | 20 | 1.00 | 1.00 | 1.00E+00 |
| <i>Morganella morganii</i>                       | Cefepime                      | 1 | 0 | 1 | 0.00 | 20 | 2  | 22 | 0.09 | 0.00 | 1.00E+00 |
| <i>Morganella morganii</i>                       | Ceftazidime                   | 1 | 0 | 1 | 0.00 | 18 | 4  | 22 | 0.18 | 0.00 | 1.00E+00 |
| <i>Morganella morganii</i>                       | Ceftriaxone                   | 1 | 0 | 1 | 0.00 | 20 | 2  | 22 | 0.09 | 0.00 | 1.00E+00 |
| <i>Morganella morganii</i>                       | Levofloxacin                  | 1 | 0 | 1 | 0.00 | 11 | 11 | 22 | 0.50 | 0.00 | 1.00E+00 |
| <i>Morganella morganii</i>                       | Nitrofurantoin                | 0 | 1 | 1 | 1.00 | 0  | 9  | 9  | 1.00 | 1.00 | 1.00E+00 |
| <i>Morganella morganii</i>                       | Piperacillin-Tazobactam       | 1 | 0 | 1 | 0.00 | 20 | 1  | 21 | 0.05 | 0.00 | 1.00E+00 |
| <i>Serratia marcescens</i>                       | Nitrofurantoin                | 0 | 1 | 1 | 1.00 | 0  | 12 | 12 | 1.00 | 1.00 | 1.00E+00 |
| <i>Staphylococcus aureus</i>                     | Linezolid                     | 1 | 0 | 1 | 0.00 | 6  | 0  | 6  | 0.00 | NaN  | 1.00E+00 |
| <i>Staphylococcus species coagulase negative</i> | Daptomycin                    | 1 | 0 | 1 | 0.00 | 3  | 0  | 3  | 0.00 | NaN  | 1.00E+00 |
| <i>Staphylococcus species coagulase negative</i> | Linezolid                     | 1 | 0 | 1 | 0.00 | 0  | 0  | 0  | NaN  | NaN  | 1.00E+00 |

|                                 |                               |   |   |   |      |    |    |    |      |      |          |
|---------------------------------|-------------------------------|---|---|---|------|----|----|----|------|------|----------|
| <i>Streptococcus pneumoniae</i> | Ceftriaxone                   | 1 | 0 | 1 | 0.00 | 13 | 2  | 15 | 0.13 | 0.00 | 1.00E+00 |
| <i>Streptococcus pneumoniae</i> | Levofloxacin                  | 1 | 0 | 1 | 0.00 | 13 | 0  | 13 | 0.00 | NaN  | 1.00E+00 |
| <i>Streptococcus pneumoniae</i> | Penicillin                    | 0 | 1 | 1 | 1.00 | 7  | 8  | 15 | 0.53 | 1.88 | 1.00E+00 |
| <i>Streptococcus pneumoniae</i> | Vancomycin                    | 1 | 0 | 1 | 0.00 | 15 | 0  | 15 | 0.00 | NaN  | 1.00E+00 |
| <i>Citrobacter freundii</i>     | Piperacillin-Tazobactam       | 1 | 0 | 1 | 0.00 | 13 | 4  | 17 | 0.24 | 0.00 | 1.00E+00 |
| <i>Citrobacter freundii</i>     | Sulfamethoxazole-Trimethoprim | 1 | 0 | 1 | 0.00 | 13 | 4  | 17 | 0.24 | 0.00 | 1.00E+00 |
| <i>Enterobacter cloacae</i>     | Levofloxacin                  | 1 | 0 | 1 | 0.00 | 82 | 10 | 92 | 0.11 | 0.00 | 1.00E+00 |
